# Supplementary material for: Manipulation of nuclear architecture through CRISPR-mediated chromosomal looping
Source: Springer Nature journal article supplement (doi:10.1038/ncomms15993), 2017-07-13
Supplement: 41467_2017_BFncomms15993_MOESM230_ESM.pdf [file 41467_2017_BFncomms15993_MOESM230_ESM.pdf]

File name: Supplementary Information

Description: Supplementary figures and supplementary table.

File name: Supplementary Data 1

Description: Mass spectrometry peptides. Raw peptide identifications are provided for each sample. Each tab represents an individual mass spectrometry run, and is labeled with the sample name, treatment condition, and treatment duration.

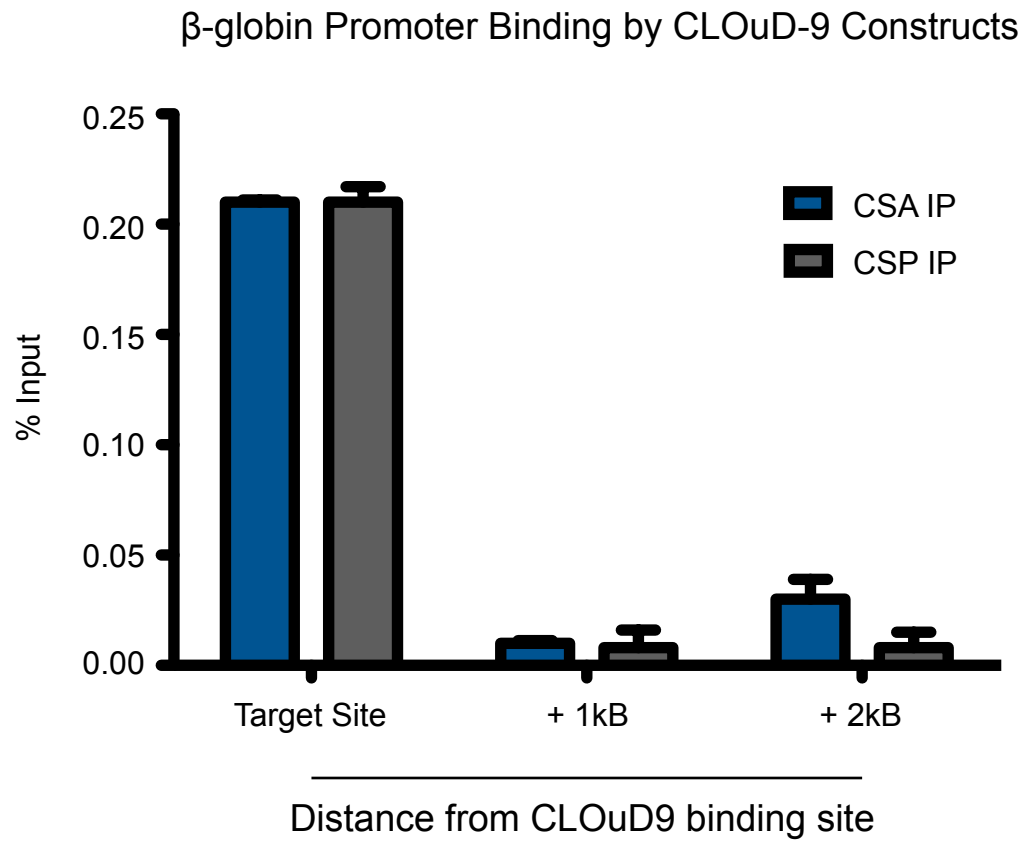

**Supplementary Figure 1. CLOuD9 constructs localize to their intended target regions.** Chromatin immunoprecipitation and quantitative PCR of CLOuD9 constructs demonstrates correct localization to their intended genomic loci.

### K562 72hr Treatment and Washout

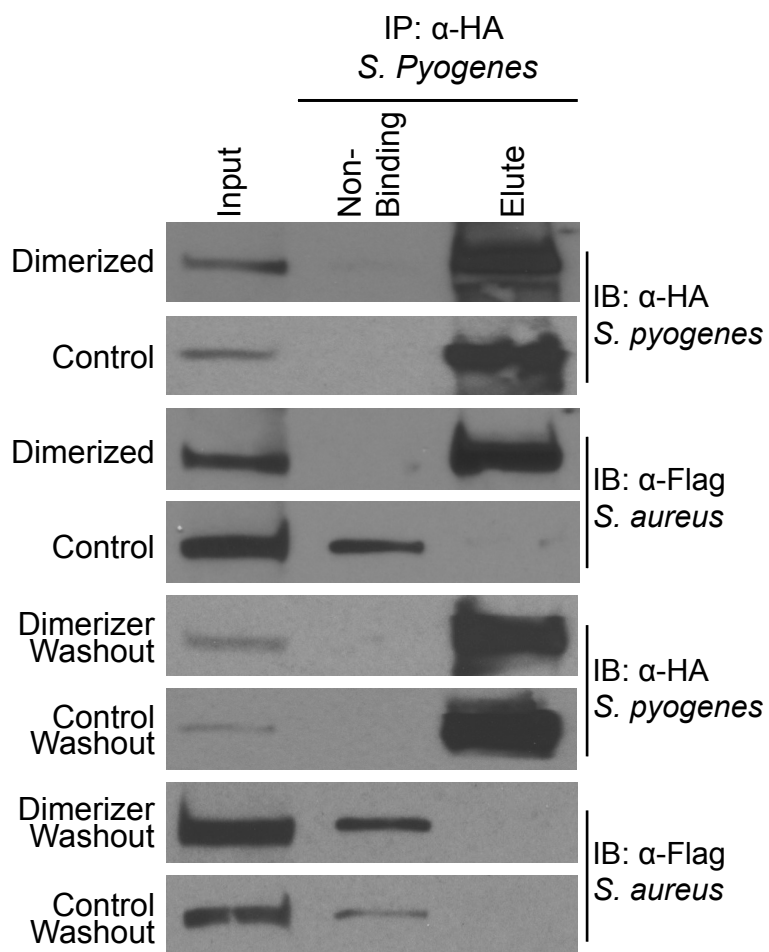

**Supplementary Figure 2. CLOuD9 constructs reversibly associate in response to ABA treatment.** Co-immunoprecipitations demonstrating association of the dCas9 proteins following 72 hours of ABA treatment is reversed following subsequent 72 hours of ligand washout.

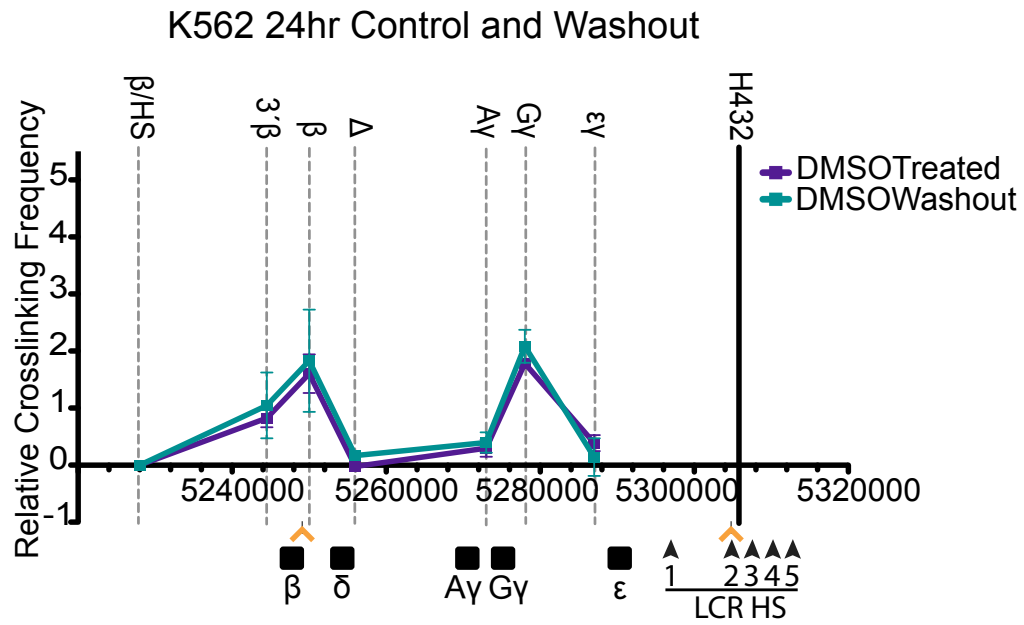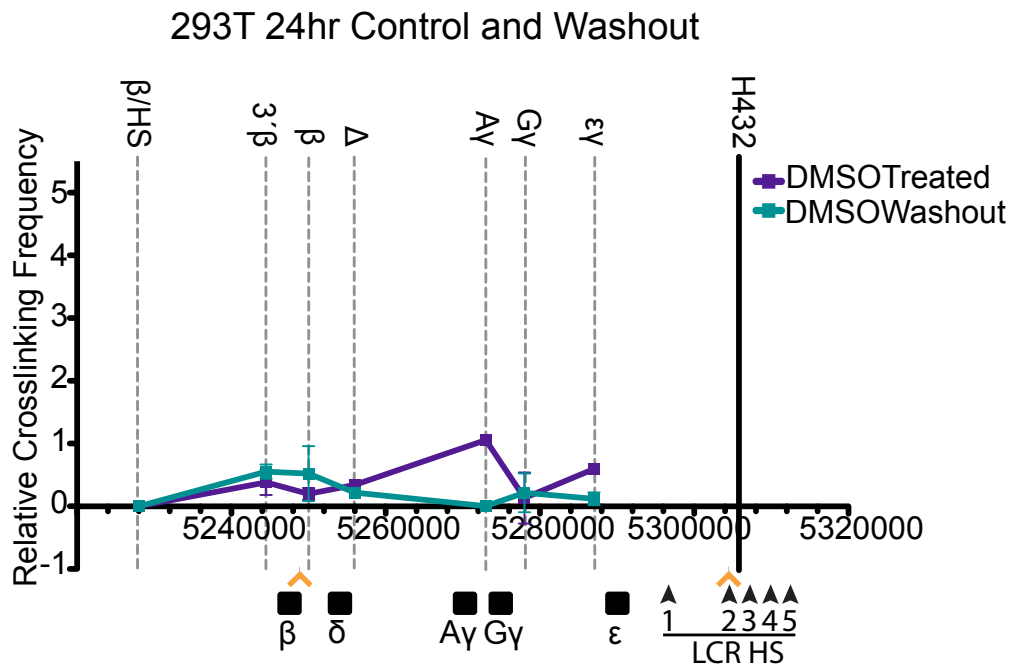

**Supplementary Figure 3. Control treatment induces no changes in chromatin contacts.**

Treatment with DMSO, a control agent, for 24 hours induces no changes in the endogenous chromatin conformation by 3C in either K562 cells or HEK 293Ts. 3C values were normalized to tubulin, and interaction frequencies between the anchor fragment and the fragment encompassing the  $\beta$ /HS fragment were set to zero. Error bars indicate SD. n = 3.

### LCR Targeting Constructs

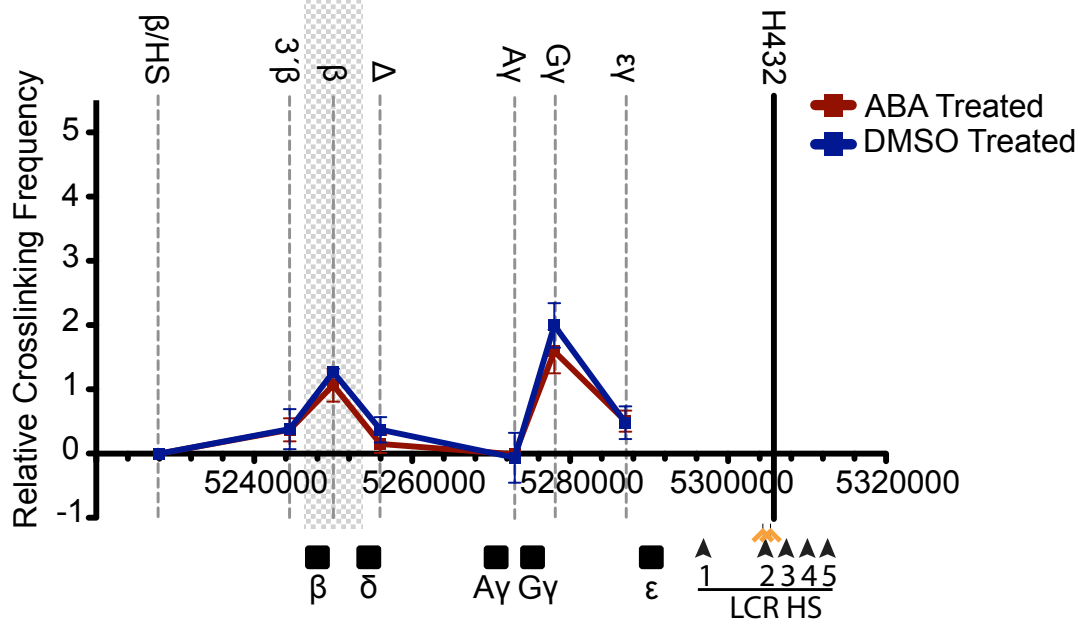

### $\beta$ -Globin Promoter Targeting Constructs

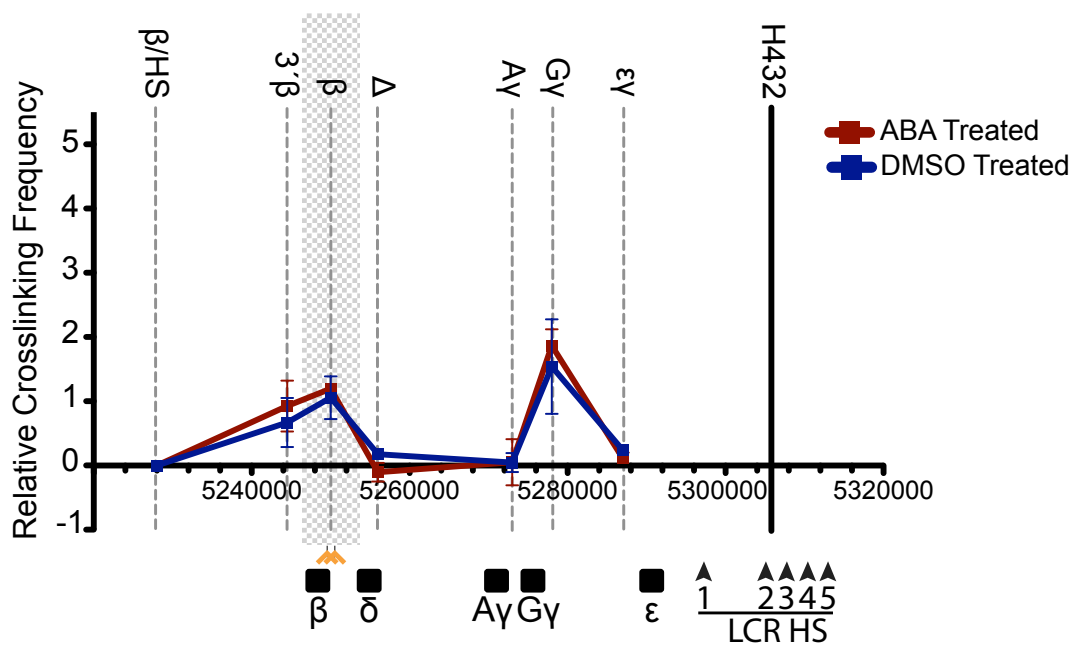



**Supplementary Figure 4. Control CLOuD9 transduced cells show no alterations in chromatin looping.** Directing two CLOuD9 constructs to either the LCR or the  $\beta$ -globin promoter induces no significant changes in chromatin structure by 3C following ABA treatment relative to control treatment. 3C values were normalized to tubulin, and interaction frequencies between the anchor fragment and the fragment encompassing the  $\beta$ /HS fragment were set to zero. Error bars indicate SD. n = 3.

72hr K562 Dimerized and Washout

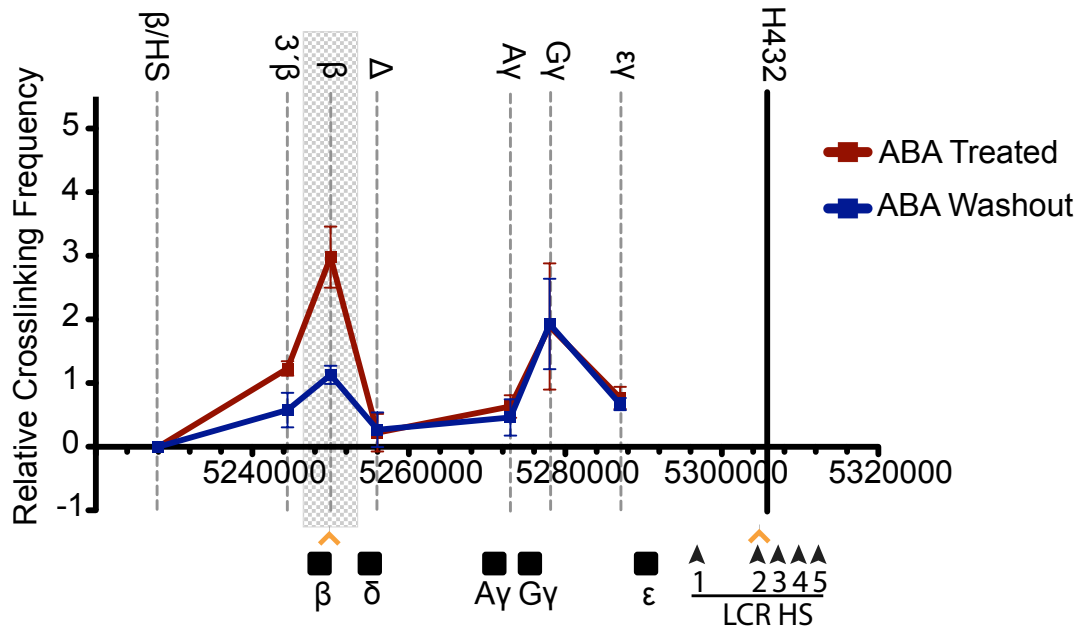

72hr K562 Control and Washout

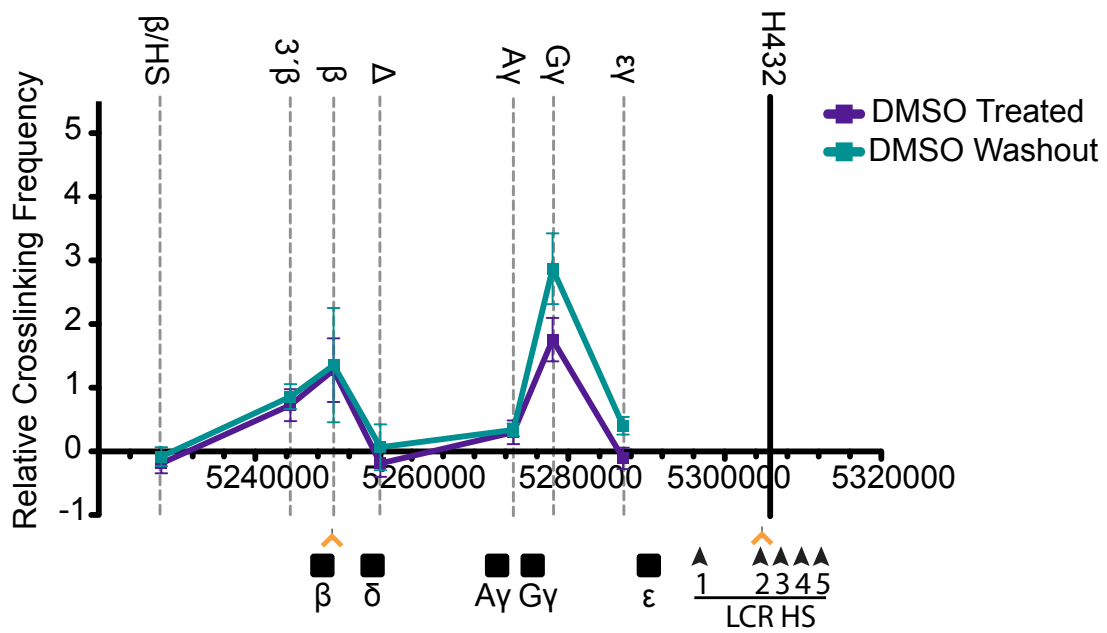

**Supplementary Figure 5. CLOuD9 chromatin looping remains reversible after 72 hours of dimerization.** 3C assay in K562s demonstrates reversibility of CLOuD9 induced  $\beta$ -globin/LCR contacts after 72 hours of ABA treatment. 3C values were normalized to tubulin, and interaction frequencies between the anchor fragment and the fragment encompassing the  $\beta$ /HS fragment were set to zero. Error bars indicate SD. n = 3.

K562 Guide Pair 2 - 72hr ABA Treated and Washout

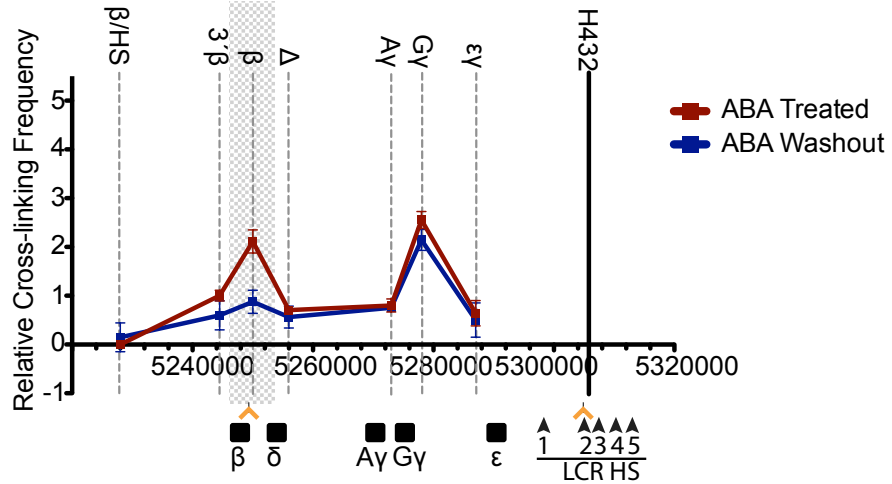

K562 Guide Pair 2 - 72hr DMSO Treated and Washout

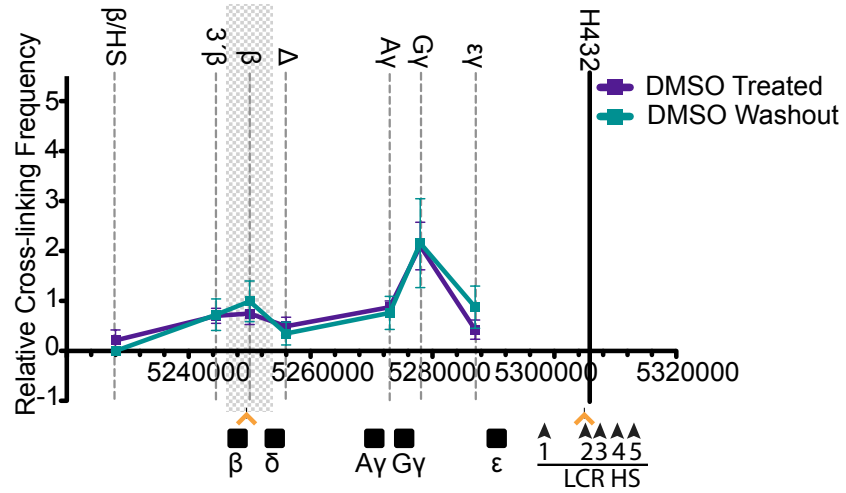

**Supplementary Figure 6. CLOuD9 induced  $\beta$ -globin/LCR looping is not impacted by globin target site.** Directing CSA and CSP constructs to alternate regions of the LCR or the  $\beta$ -globin promoter results in similar reversible changes in loop induction by 3C following 72 hours of ABA treatment. 3C values were normalized to tubulin, and interaction frequencies between the anchor fragment and the fragment encompassing the  $\beta$ /HS fragment were set to zero. Error bars indicate SD. n = 3.

K562 Guide Pair 2 -  $\beta$ -globin Expression

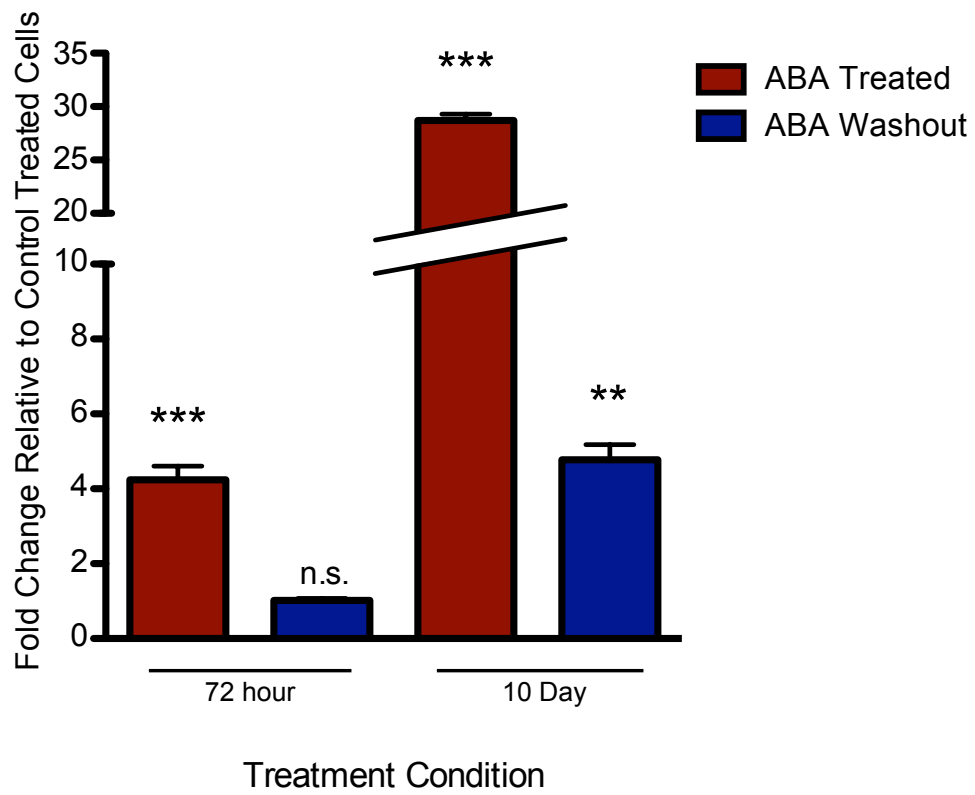

**Supplementary Figure 7. CLOuD9 induced alterations in gene expression are sustained regardless of globin target site.** Directing CSA and CSP constructs to alternate regions of the  $\beta$ -globin promoter and LCR has no impact on induction of gene expression following 72 hours of dimerization. However, while some impact on the strength of gene expression following long-term (10 day) dimerization was observed, high levels of  $\beta$ -globin relative to control treated cells were sustained following subsequent ligand washout for 10 additional days. Significance given relative to control treated cells.  $**p < 0.001$ ,  $t = 10.25$ ,  $df = 5$ ;  $***p < 0.0001$ , left to right  $t = 8.697$ ,  $df = 6$ ,  $t = 40.31$ ,  $df = 7$ ; n.s. non-significant. All error bars indicate SD.

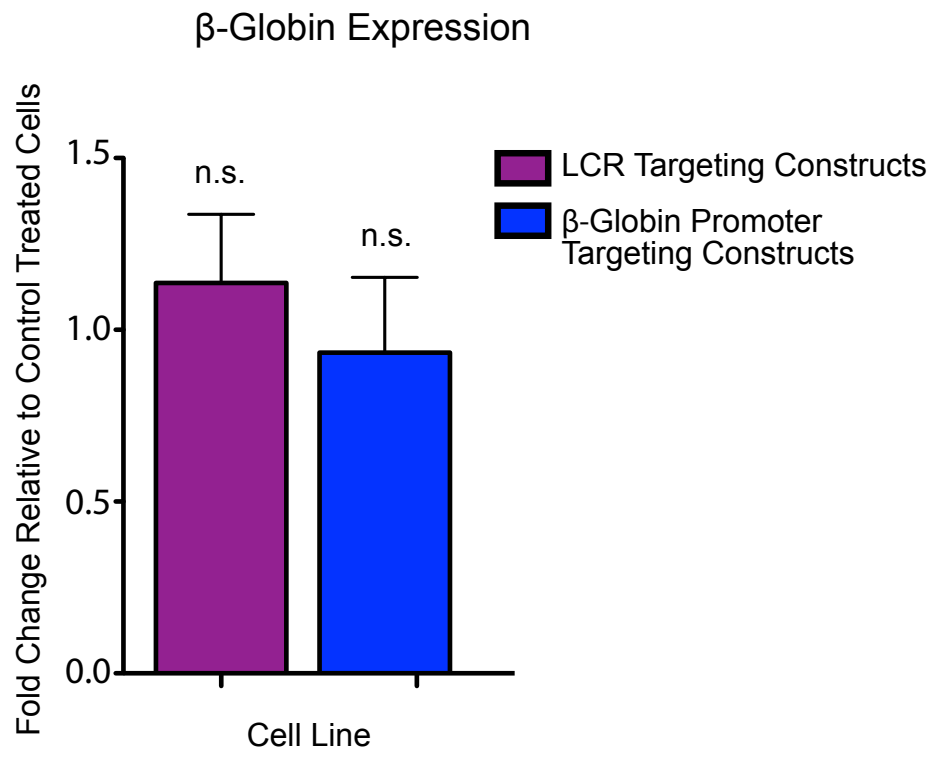



**Supplementary Figure 8. Control CLOuD9 transduced cells show no alterations in  $\beta$ -globin expression.** Directing two CLOuD9 constructs to either the LCR or the  $\beta$ -globin promoter induces no significant changes in  $\beta$ -globin expression following ABA treatment relative to control treatment. Significance given relative to control treated cells. n.s. non-significant.

K562 10 Day Dimerized and Washout

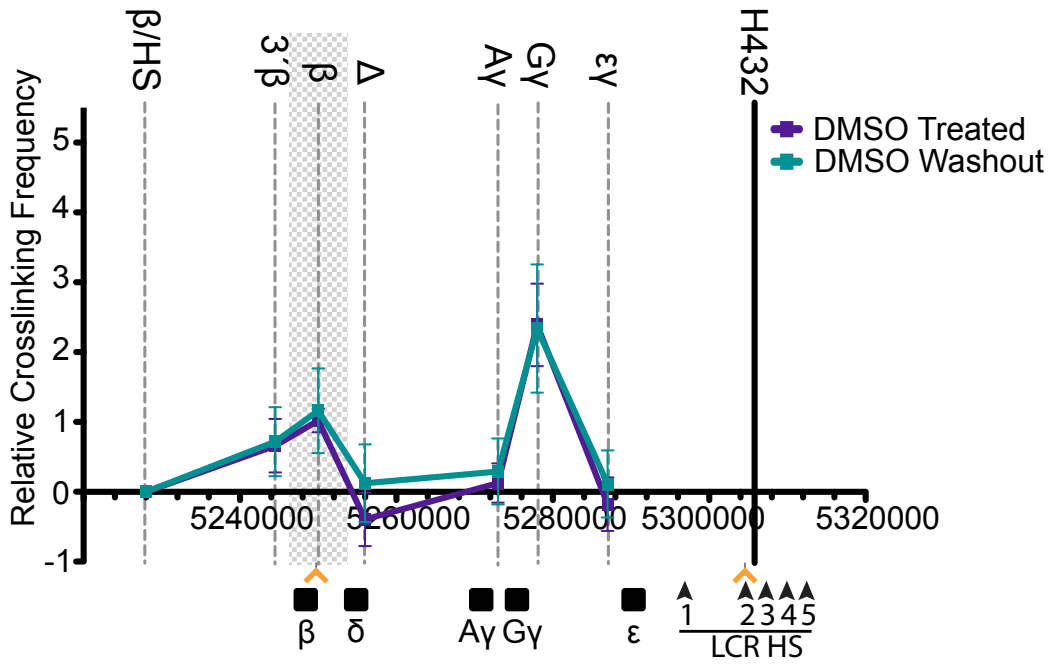

293T 10 Day Dimerized and Washout

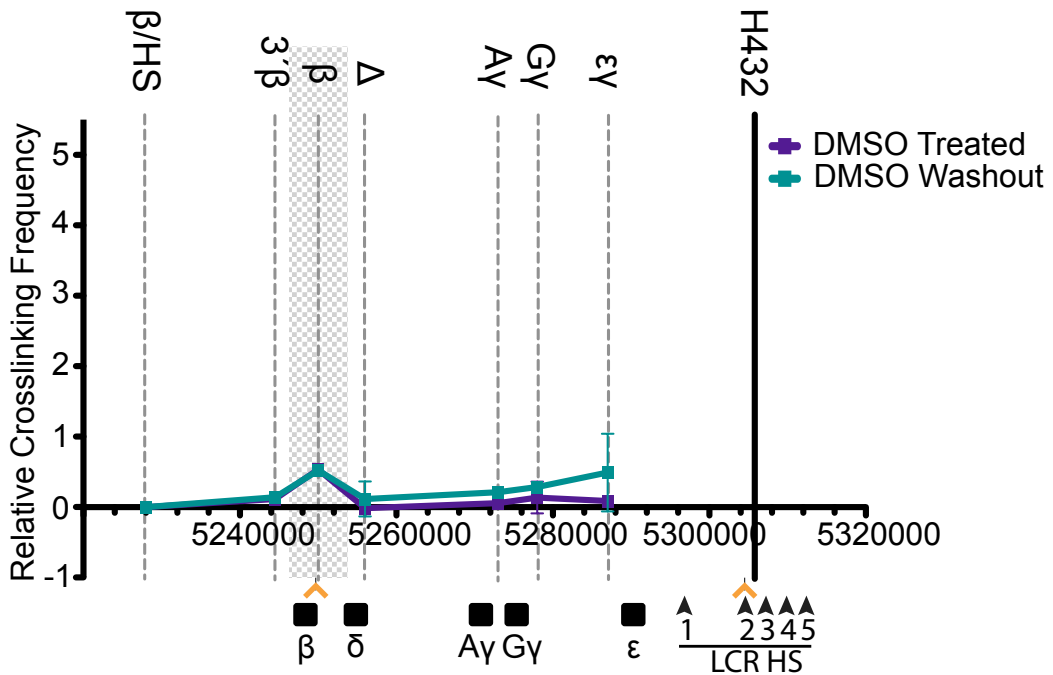

**Supplementary Figure 9. Long-term control treatment induces no changes in chromatin contacts.** Treatment with DMSO, a control agent, for 10 days induces no change in endogenous chromatin conformation by 3C in either K562 cells or HEK 293Ts. 3C values were normalized to tubulin, and interaction frequencies between the anchor fragment and the fragment encompassing the  $\beta$ /HS fragment were set to zero. Error bars indicate SD. n = 3.

K562 Guide Pair 2 - 10 Day ABA Treated and Washout

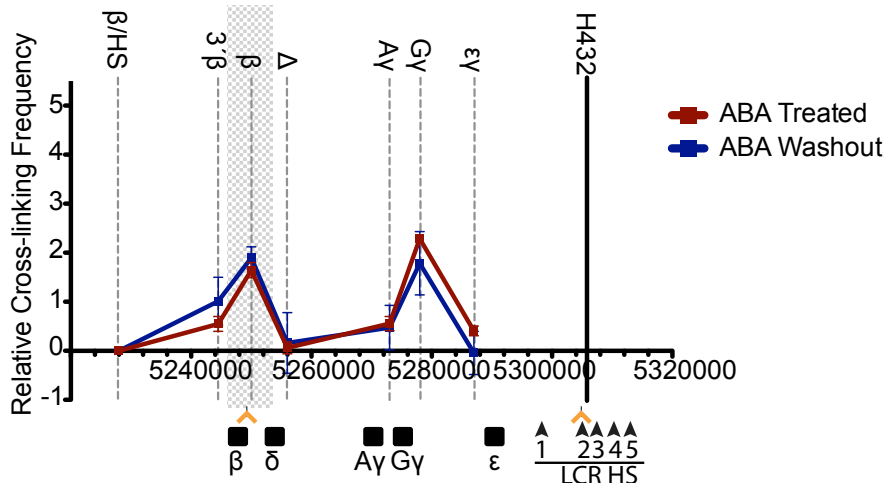

K562 Guide Pair 2 - 10 Day DMSO Treated and Washout

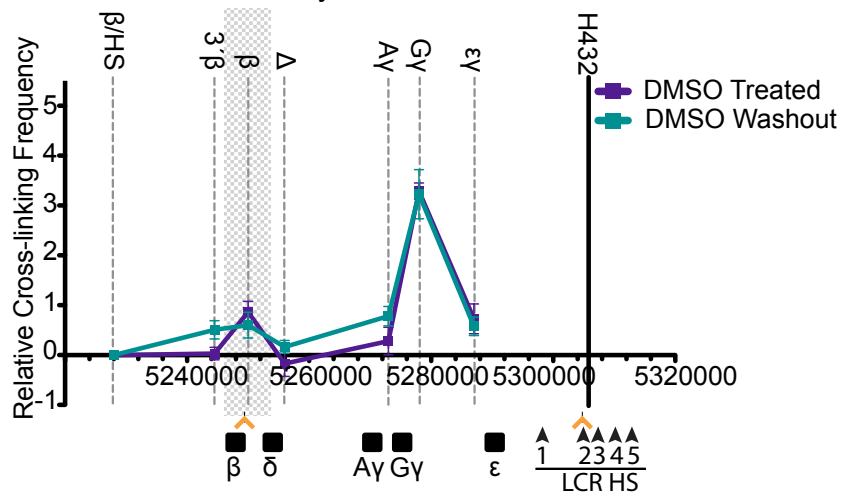

**Supplementary Figure 10. Long-term CLOuD9 induced  $\beta$ -globin/LCR looping is not impacted by globin target site.** Directing CSA and CSP constructs to alternate regions of the LCR or the  $\beta$ -globin promoter results in similarly sustained loop induction as demonstrated by 3C following 10 days of ABA treatment and 10 days of subsequent ligand washout. 3C values were normalized to tubulin, and interaction frequencies between the anchor fragment and the fragment encompassing the  $\beta$ /HS fragment were set to zero. Error bars indicate SD. n = 3.

### K562 10 Day Treatment and Washout

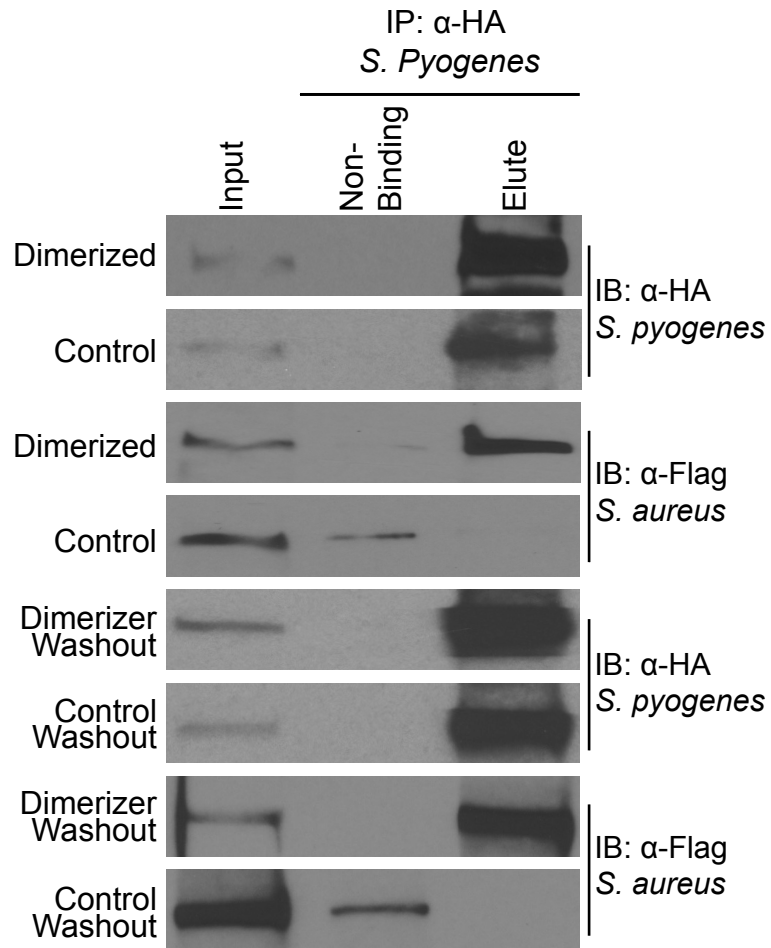

**Supplementary Figure 11. CLOuD9 constructs irreversibly associate in response to long-term ABA treatment.** Co-immunoprecipitations demonstrating irreversible association of the CSA and CSP dCas9 proteins following 10 days of ABA treatment and 10 subsequent days of ligand washout.

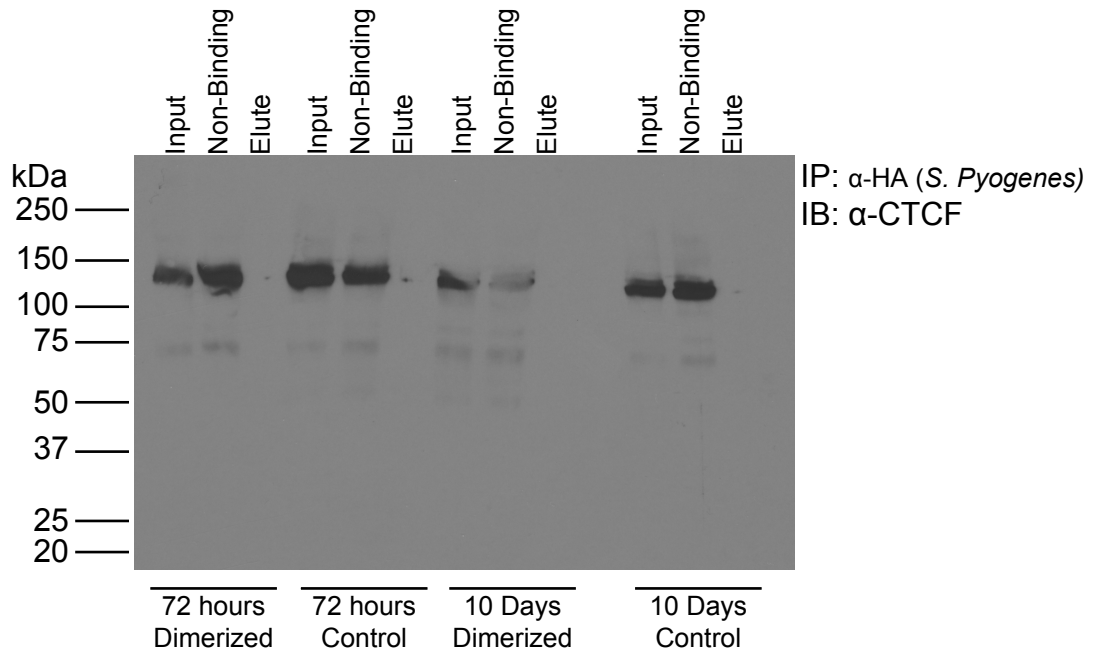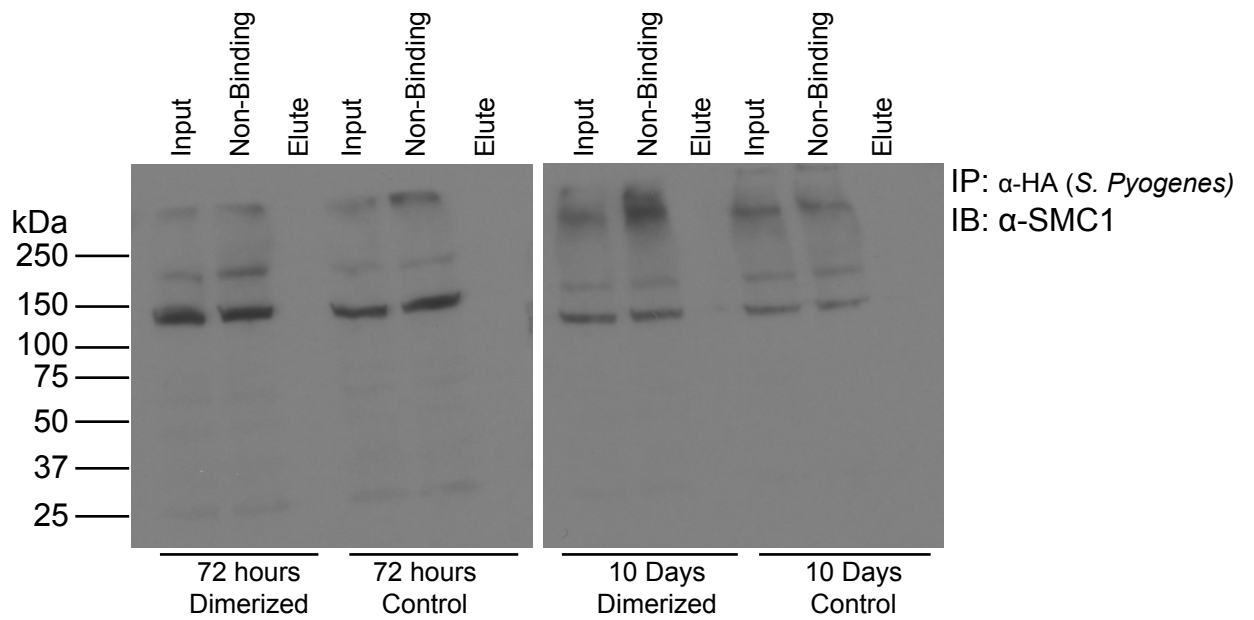



**Supplementary Figure 12. Uncropped images of immunoblots in Fig 4b.**

Immunoprecipitation of CLOuD9 complexes demonstrates that CTCF and cohesin were not found to be localized to the induced loops.

K562 10 Day Treatment

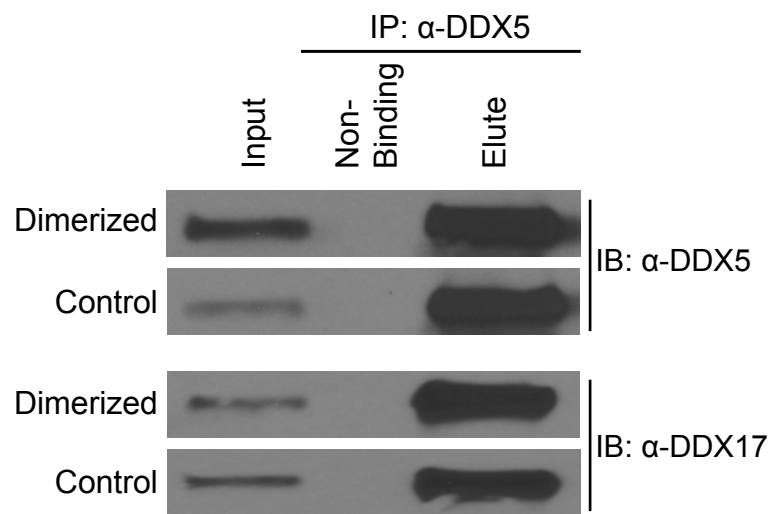

**Supplementary Figure 13. RNA helicases DDX5 and DDX17 co-associate.** Co-immunoprecipitations demonstrating DDX17 associates with DDX5 in K562 cells regardless of treatment condition.

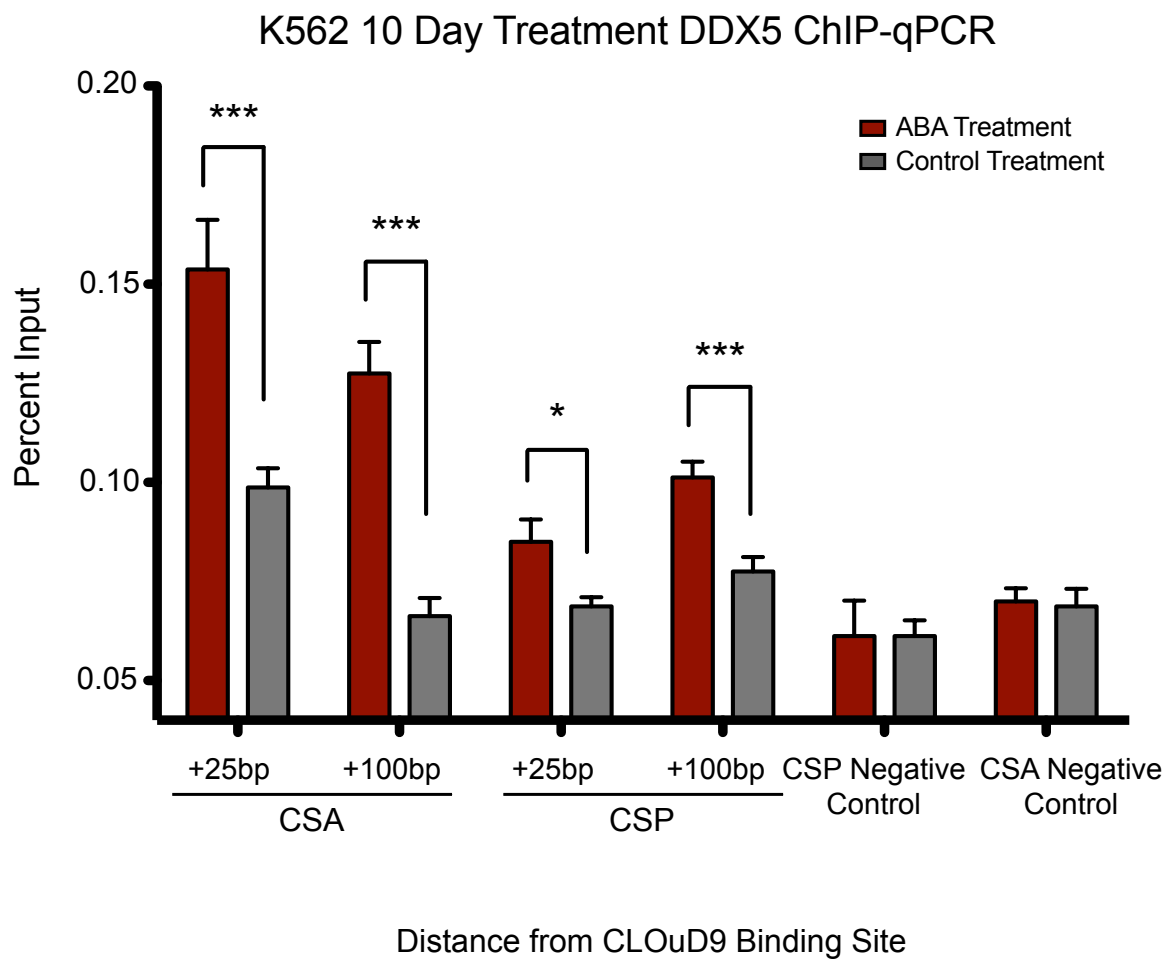

**Supplementary Figure 14. RNA helicases DDX5 and DDX17 localize to CLOuD9 target regions.** Chromatin immunoprecipitation and quantitative PCR of CLOuD9 constructs demonstrates their localization to regions of chromatin immediately adjacent to CLOuD9 target sites.  $*p < 0.05$ ,  $t = 2.662$ ,  $df = 14$ ;  $***p < 0.0001$ , left to right  $t = 4.1$ ,  $df = 14$ ,  $t = 6.659$ ,  $df = 14$ ;  $t = 4.392$ ,  $df = 14$ . All error bars indicate SD.

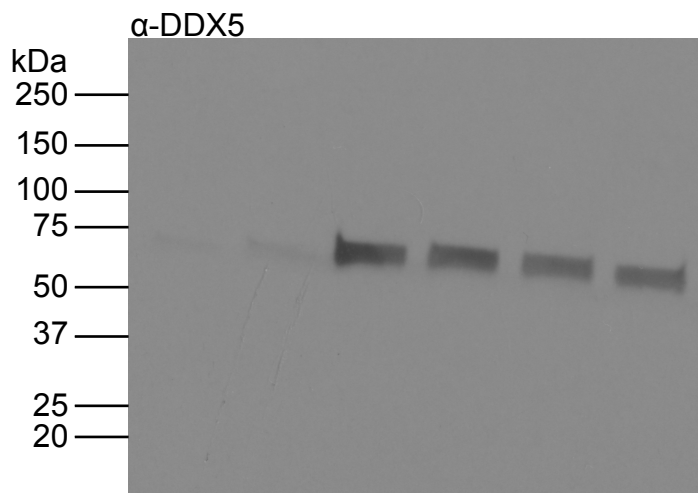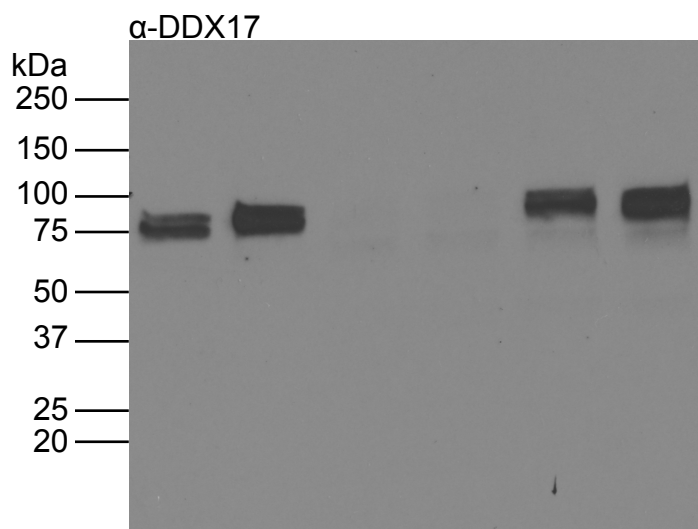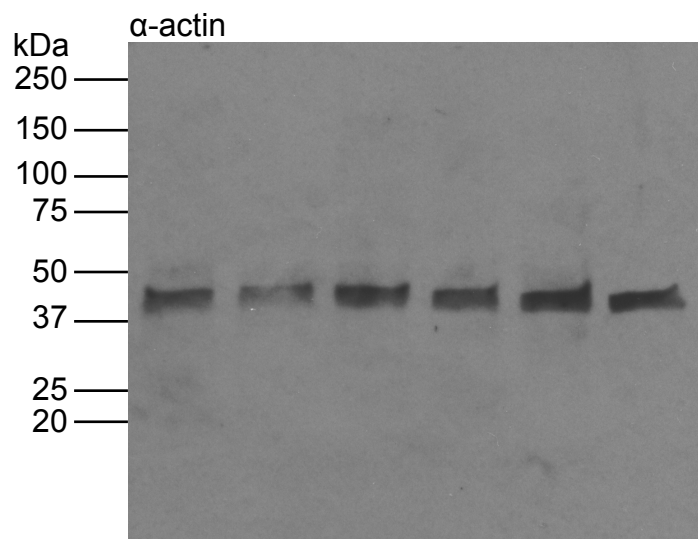

**Supplementary Figure 15. Uncropped images of immunoblots in Fig 4c.** shRNA knockdown of DDX5 and DDX17 in K562s containing CLOuD9 constructs.

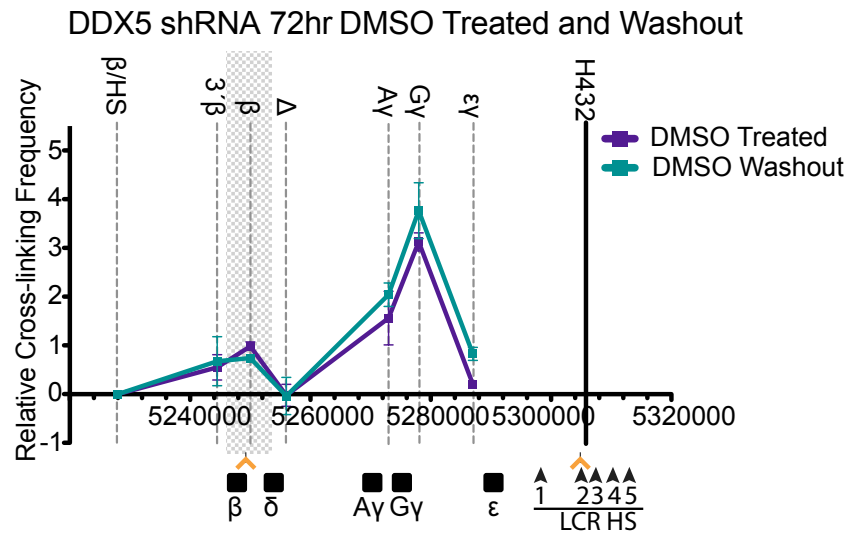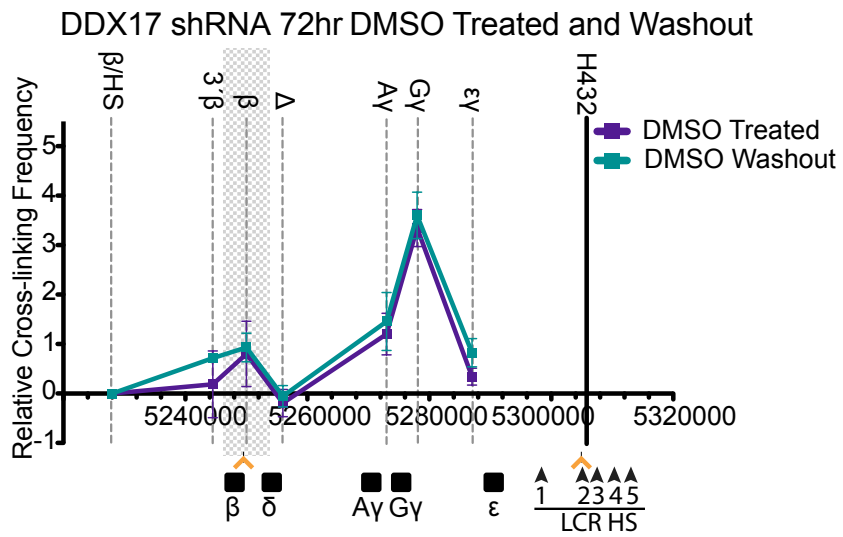



**Supplementary Figure 16. Control treatment of DDX5 and DDX17 knockdown CLOuD9 cells induces no changes in chromatin contacts.** Treatment with DMSO, a control agent, for 72 hours induces no changes in endogenous chromatin conformation by 3C in DDX5 or DDX17 knockdown K562 cells. 3C values were normalized to tubulin, and interaction frequencies between the anchor fragment and the fragment encompassing the  $\beta$ /HS fragment were set to zero. Error bars indicate SD. n = 3.

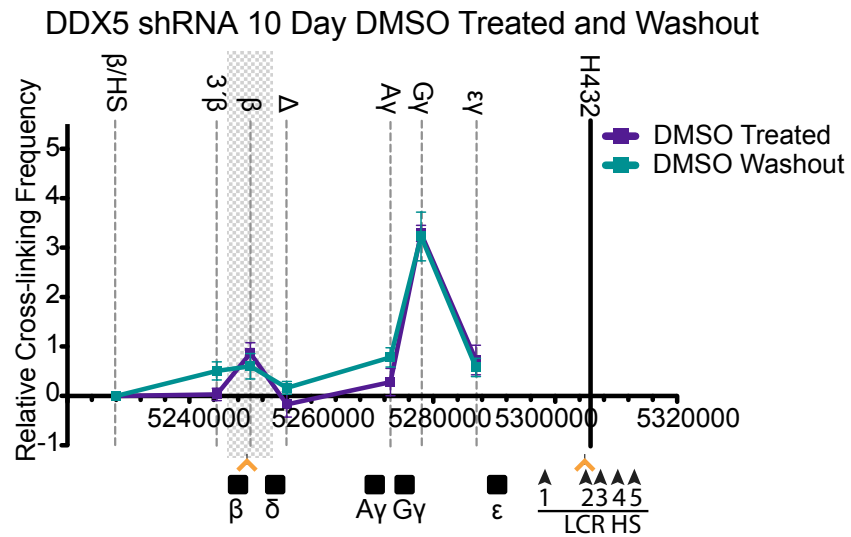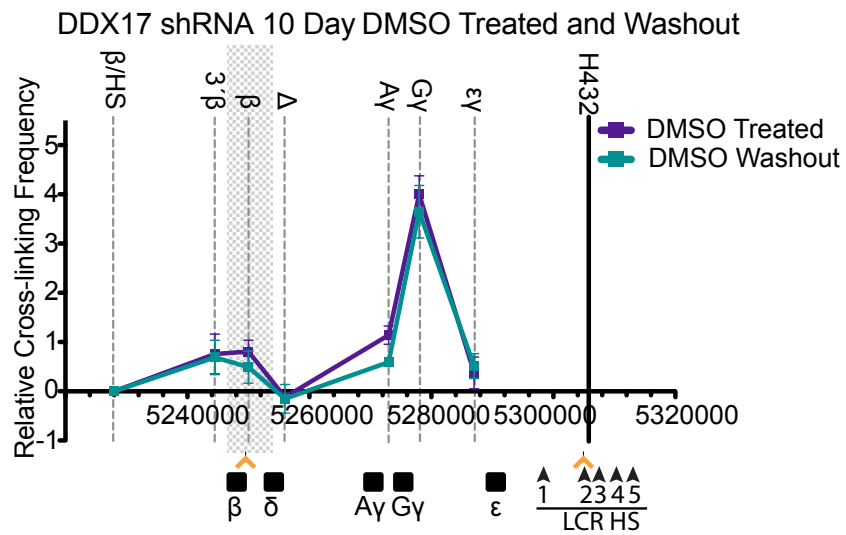

**Supplementary Figure 17. Long-term control treatment of DDX5 and DDX17 knockdown CLOuD9 cells induces no changes in chromatin contacts.** Treatment with DMSO, a control agent, for 10 days induces no changes in endogenous chromatin conformation by 3C in DDX5 or DDX17 knockdown K562 cells. 3C values were normalized to tubulin, and interaction frequencies between the anchor fragment and the fragment encompassing the  $\beta$ /HS fragment were set to zero. Error bars indicate SD. n = 3.

**Supplementary Table 1. List of primer sequences for gRNAs, qRT-PCR, 3C, and CHIP qPCR.**

| <b>gRNA Sequences</b>            |                                |                       |
|----------------------------------|--------------------------------|-----------------------|
| Name                             | Sequence 5'-3'                 | CLOuD9 Construct      |
| HBB Promoter Pair 1              | TAGTCTGGGTATACTTAGAGG          | CSA                   |
| LCR Pair 1                       | CTAGAGTGATGACTCCTATC           | CSP                   |
| HBB Promoter Pair 2              | AAGTTGATGCACTAAAAGTGG          | CSA                   |
| LCR Pair 2                       | AATATGTCACATTCTGTCTC           | CSP                   |
| Oct4 Promoter                    | CTTATGGCTGTTGATGCATTG          | CSA                   |
| Oct4 Distal 5'Enhancer           | CTCTTTGGATCGCGTCACTC           | CSP                   |
| <b>qPCR Primers</b>              |                                |                       |
| Primer                           | Forward 5'-3'                  | Reverse 5'-3'         |
| $\beta$ -globin                  | TGGGCAACCCTAAGGTGAAG           | GTGAGCCAGGCCATCACTAAA |
| Oct4                             | TGTA CTCTCGGTCCCTTTC           | TCCAGGTTTCTTTCCCTAGC  |
| GapDH                            | ACCACAGTCCATGCCATCACT          | CCATCACGCCACAGTTTCC   |
| <b>3C Primers</b>                |                                |                       |
| <u><math>\beta</math>-globin</u> |                                |                       |
| Name                             | Primer Sequence 5'-3'          |                       |
| 3C B/HS                          | TCTTAGAAAGCCTTTACAATTCCTTTATC  |                       |
| 3C 3 Beta                        | AGCTTAGTGATACTTGTGGGCCA        |                       |
| 3C Beta                          | GCTCGGCACATGTCCCATCCAG         |                       |
| 3C Delta                         | AAAAAATGTGGAATTAGACCCAGGAATG   |                       |
| 3C 5 Delta                       | GGGTGTGTATTTGTCTGCCA           |                       |
| 3C G/A                           | AATTTGAAGATACAGCTTGCCTCCGATAAG |                       |
| 3C Gg                            | GGGTTCATCTTTATTGTCTCCT         |                       |
| 3C E/G                           | CCACCCCGATAAAGATTTTTCTCCATCA   |                       |
| 3C HS432                         | CCAAATGGGTGACTGTAGGGTTGAGA     |                       |
| 3' HS1                           | ATTCCCGTTTTTATGAAATCAACTTT     |                       |
| 3' 3'HS1                         | CTCATAGATTTCTCAATGGCCAAA       |                       |
| <u>Oct4</u>                      |                                |                       |
| Name                             | Primer Sequence 5'-3'          |                       |
| PromoterF1                       | TGTGCCTTCAGGGGCCAGTC           |                       |
| PromoterF2                       | AGTCACCCTCTCAGCTCCTCA          |                       |
| PromoterR1                       | TGGGGTGAAATTTGGCAGGCT          |                       |
| PromoterR2                       | AGGCTGGGCAGATGGTGCCA           |                       |
| 5'EnhF1                          | CAAAGTCACACTGCACCCGCT          |                       |
| 5'EnhF2                          | ATGTGGCTCCCTCCCATGTAC          |                       |
| 5'EnhR1                          | CACTGGCAAGGATTATCTCATG         |                       |
| 5'EnhR2                          | TGTGTCCAGTTGCCAAATGAGG         |                       |
| DistalEnhF1                      | CAGGGCACACACTTTTGCAG           |                       |
| DistalEnhF2                      | GTATCCAAAAACCCAAGCCAGGTC       |                       |
| DistalEnhR1                      | TAGCAGGCCCCCAAGGAGGA           |                       |
| DistalEnhR2                      | ACTGGGAAGGAAGTGGCACT           |                       |

|                          |                                |
|--------------------------|--------------------------------|
| 3'EnhF1                  | TGCCATTACCATCCCACGGT           |
| 3'EnhF2                  | CTAGGGGAGAAGCCCGGGTTG          |
| 3'EnhR1                  | TGGTCCCCACTTCCCCAGGTG          |
| 3'EnhR2                  | GCGGGAACAGGCAGGCTCT            |
| <b>ChIP qPCR Primers</b> |                                |
| <b>Name</b>              | <b>Primer Sequence 5' - 3'</b> |
| HBB 7F1                  | CAACAAGGTGCCAAGTCTTTT          |
| HBB 7R1                  | ACATCACCTGGATGGGACAT           |
| HBB 13F1                 | GAATGGCCCTAGTCTGGGTA           |
| HBB 13R1                 | TGCTGCTTTTGAAACAAATGA          |
| HBB 10F1                 | CCTATGGCAAAAATGGTGCT           |
| HBB 10R1                 | CATGCAGTAAACAACCGAACA          |
| C5 1F2                   | TTTGCCATCTGCCCTGTAAG           |
| C5 1R2                   | AGTCATGCTGAGGCTTAGGG           |
| C5 6F1                   | TCAGCTCTGCCTTTCTCCTC           |
| C5 6R1                   | GCAGACCTTAACTGGCATCC           |
| C5 8F1                   | CAGTTGCATGCTACCTTAAAGA         |
| C5 8R1                   | AAGCTGAATCTGCTGCCAAC           |
| DistalHBBF               | GCCGTAAAACATGGAAGGAA           |
| DistalHBBR               | CCCATTGCTTATCCTGCAT            |
| 3'HBBF                   | TTCCAGAATCTAGCATCTACCTACC      |
| 3'HBBR                   | TGCTTCTGGCTCTGCAGTTA           |
| HBBF                     | GCAAGAAAGCGAGCTTAGTGA          |
| HBBR                     | CAAAGAATTCACCCACCAG            |
| 5'HBBF                   | CCTCACCACCAACTTCATCC           |
| 5'HBBR                   | GCAACCTCAAACAGACACCA           |
| Proximal PromF           | TAGATGGCTCTGCCCTGACT           |
| Proximal PromR           | CACTTAGACCTCACCTGTGG           |
| Distal PromF             | TGGGGTAATCAGTGGTGTCA           |
| Distal PromR             | TTTTGTTCCCCCAGACACTC           |
| Positive Control1F       | ACCCTTCAGCAGTTCCACAC           |
| Positive Control1R       | ACCCTTCAGCAGTTCCACAC           |
| Positive Control2F       | TGGTATTTTATTCTGAAACACAGAGG     |
| Positive Control2R       | GCTTCGGTGTTTCAGTGGATT          |
| Negative ControlF        | CCCAAATGAGATTATGCCACTG         |
| Negative ControlR        | CTATGTTTGTGTTGCAGAGCCC         |
